# Supplementary material
Source: Research Square preprint supplement (doi:10.21203/rs.3.rs-9369378/v1)
Supplement: Supplementary file 1 [file 8c56593fe1d87958c73bc2e3.docx]

**Appendix A: Search query in PubMed**

| Date | Queries | Number of indexed articles |
| --- | --- | --- |
| 30-05-2022 | ((((maximize[Title/Abstract]) OR (increase[Title/Abstract])) OR (improve[Title/Abstract])) AND ((retention strategy[Title/Abstract]) OR (retention strategy[Title/Abstract]))) | 57 |
| 30-05-2022 | (((minimize[Title/Abstract]) OR (limit[Title/Abstract]) OR (prevent[Title/Abstract])) AND ((attrition rate[Title/Abstract]) OR (attrition rates[Title/Abstract]) OR (patient dropouts[Title/Abstract]) OR (loss to follow-up[Title/Abstract]))) | 618 |
